# Supplementary material
Source: PubMed Central journal article supplement (PMC7963636)
Supplement: 17-00097.pdf [file 17-00097.pdf]

**ON-LINE FIGURE.** Representative section in a subject with bvFTD showing ROIs where phase is measured in the superior frontal gyrus medial to the superior frontal sulcus (A); the precentral gyrus just anterior to the central sulcus GM and the central sulcus CSF (B); the globus pallidus (1,2), putamen (3,4), and caudate nucleus (5,6); insula (7,8); and frontal white matter (9,10) (C); anterior cingulate with adjacent medial frontal lobe (D); temporal pole (E); dentate nucleus (F); red nucleus (1,2), substantia nigra (3,4) (G); and head and body of hippocampus (H).
